# Supplementary material for: B Cell Lymphoma Immunotherapy Using TLR9-Targeted Oligonucleotide STAT3 Inhibitors
Source: PubMed Central journal article supplement (PMC5910676; doi:10.1016/j.ymthe.2018.01.007), 2018-01-17
Supplement: mmc1.pdf [file mmc1.pdf]

YMTHE, Volume 26

## **Supplemental Information**

### **B Cell Lymphoma Immunotherapy**

#### **Using TLR9-Targeted**

#### **Oligonucleotide STAT3 Inhibitors**

**Xingli Zhao, Zhuoran Zhang, Dayson Moreira, Yu-Lin Su, Haejung Won, Tomasz Adamus, Zhenyuan Dong, Yong Liang, Hongwei H. Yin, Piotr Swiderski, Raju K. Pillai, Larry Kwak, Stephen Forman, and Marcin Kortylewski**

## **Supplementary Materials and Methods**

### **Western blot for phospho-ikB $\alpha$**

10<sup>6</sup> of mouse A20 cells or human OCI-Ly3 lymphoma cells were engrafted SC into BALB/C or NSG mice, respectively. After tumors were established, mice were treated using 5 mg/kg CpG(B)-STAT3dODN, control CpG(B)-scrODN or PBS every day for 3 days. Tumors were harvested and protein was extracted for Western blot detection of phospho-ikB $\alpha$  (Cell signaling) levels compared to  $\beta$ -actin (Santa Cruz) used as a loading control.

### **Animal studies**

BALB/c mice with established disseminated A20<sup>LUC</sup> lymphoma were treated using 5 mg/kg of CpG(B)-STAT3dODN injected every other day, 200mg/kg of atovaquone (Mepron™) injected daily or PBS. Lymphoma burden was monitored using BLI for up to 100 days for surviving mice.

### **Luminex assays**

Cytokine secretion from cultured healthy donors' PBMC was analyzed using Human Magnetic Luminex Screening Assay (R&D) on Flexmap 3D system (Luminex).

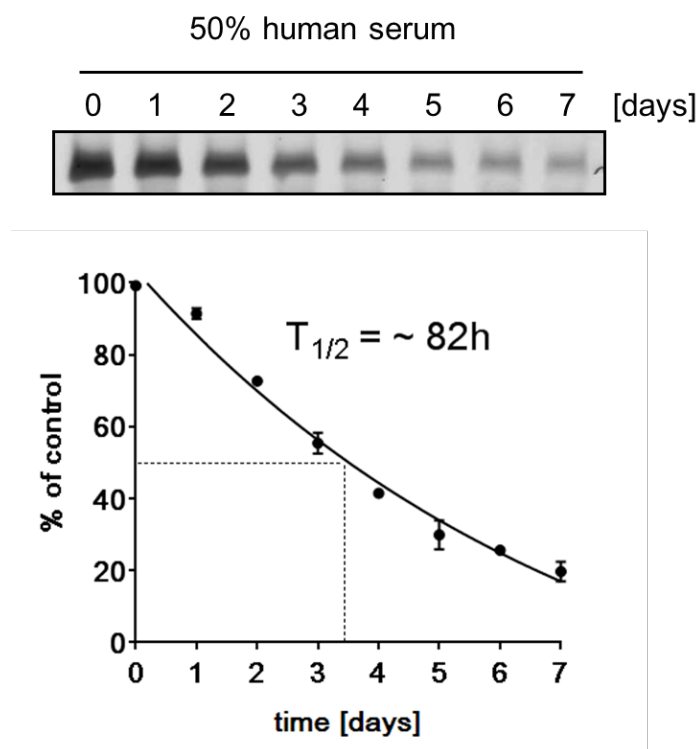

**Supplemental Fig. S1. Stability of chemically modified CpG-STAT3dODN in human serum.** CpG(B)-STAT3dODN were incubated in 50% human serum at 37°C for the indicated times. The samples were then resolved on the 7.5 M Urea/20 % PAGE gel and stained using ethidium bromide; the representative gel image for CpG(B)-STAT3dODN is shown in the upper panel. Bottom panel shows the quantification of band intensities for CpG(B)-STAT3dODN; shown are means  $\pm$  SEM ( $n = 3$ ). The estimated half-life ( $T_{1/2}$ ) of CpG(B)-STAT3dODN was indicated.

## A20

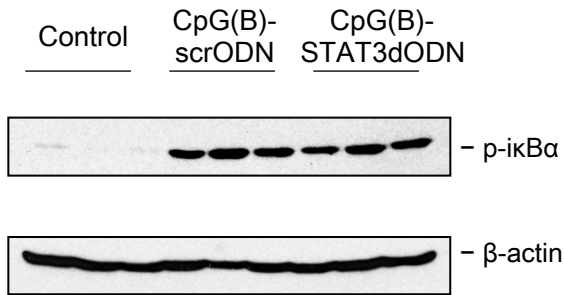

## OCI-Ly3

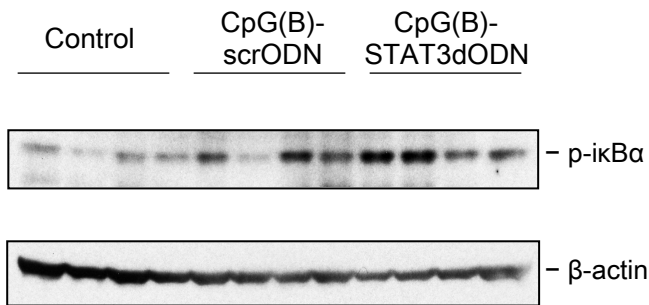

**Supplemental Fig. S2. *In vivo* CpG(B)-STAT3dODN treatment results in activation of NF-κB signaling.** (A)  $10^6$  of mouse A20 cells or human OCI-Ly3 lymphoma cells were engrafted SC into BALB/C or NSG mice, respectively. After tumors were established, mice were treated using 5 mg/kg CpG(B)-STAT3dODN, control CpG(B)-scrODN or PBS every day for 3 days. Tumors were harvested and protein was extracted for Western blot detection of phospho-ikBα levels compared to β-actin used as a loading control.

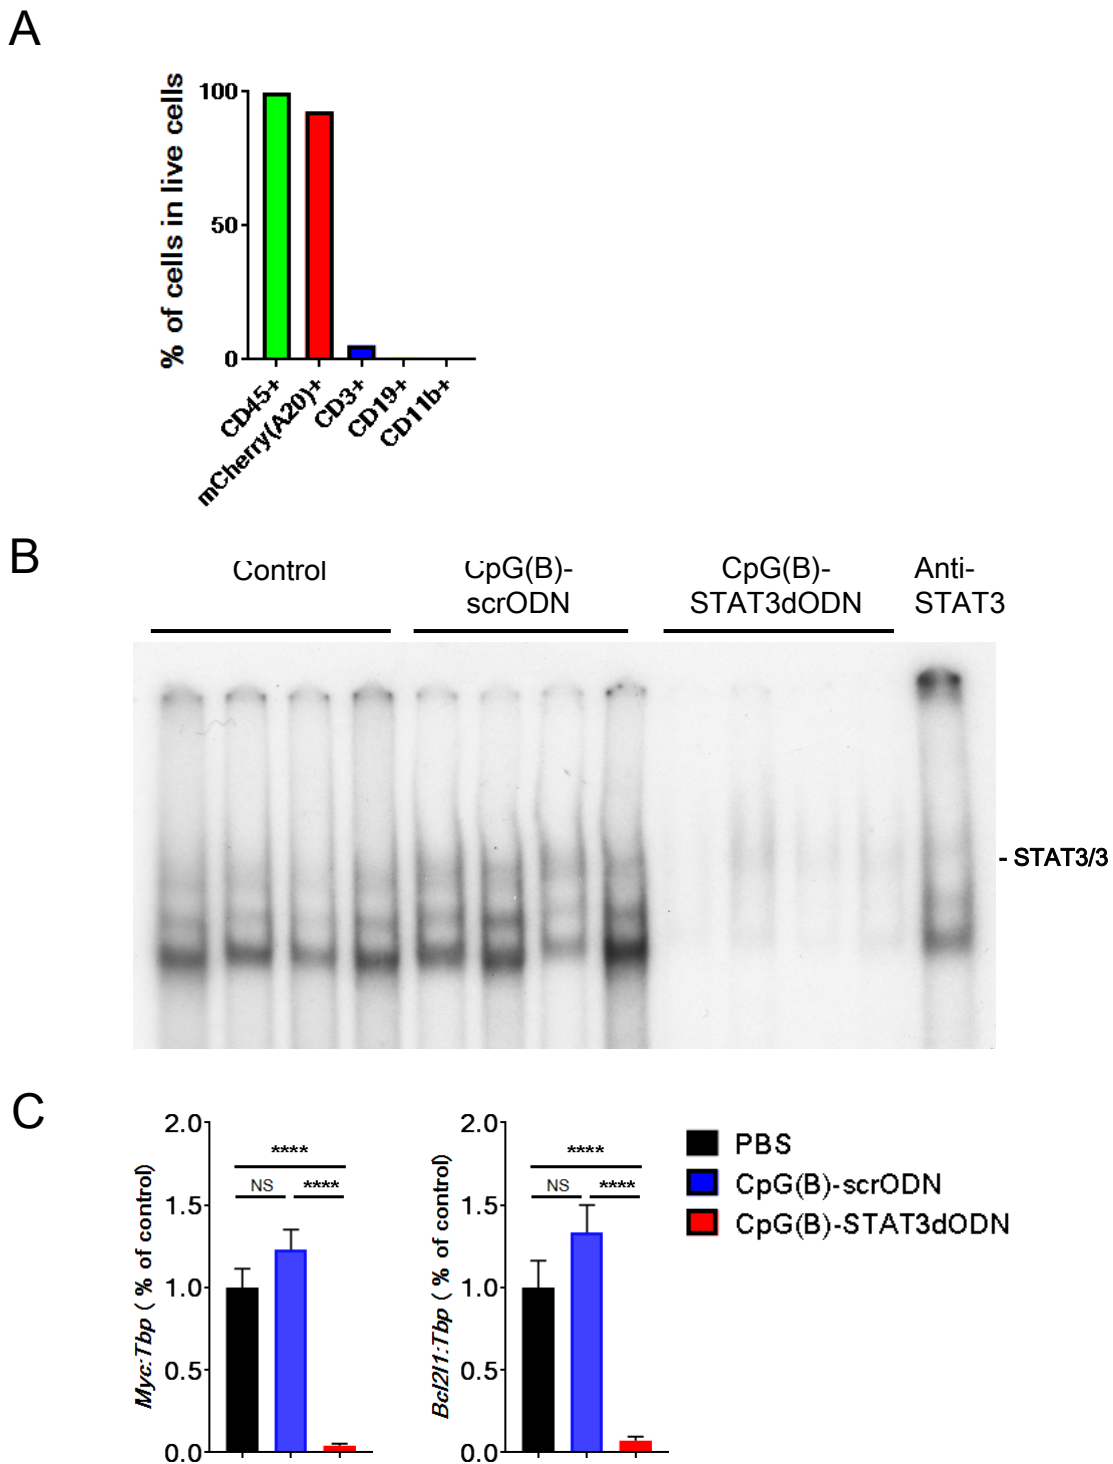

**Supplemental Fig. S3. Local administration of CpG(B)-STAT3dODN inhibits STAT3 and downstream target gene expression in A20 lymphoma.**

BALB/c mice were engrafted SC using  $10^7$  A20/mCherry/Luc cells. After tumors were established, mice treated with 1 mg/kg CpG(B)-STAT3dODN, CpG(B)-scrODN or PBS every day for 3 days. Tumors were harvested to assess cellular composition, STAT3 inhibition and downstream gene activity (**A**) Cellular composition of A20 tumors from mice before treatment as assessed using flow cytometry. Over 95% of cells are CD45<sup>+</sup>/mCherry<sup>+</sup> A20 lymphoma cells with a small infiltrate of CD3<sup>+</sup> T cells and <1% of CD45<sup>-</sup> stromal cells. STAT3 activity measured using EMSA (**B**) and *c-Myc* and *Bcl2/1* expression using qPCR (**C**) after normalization to *Tbp*. Results (B,C) from one of two independent experiments; means  $\pm$  SEM ( $n = 4$ ).

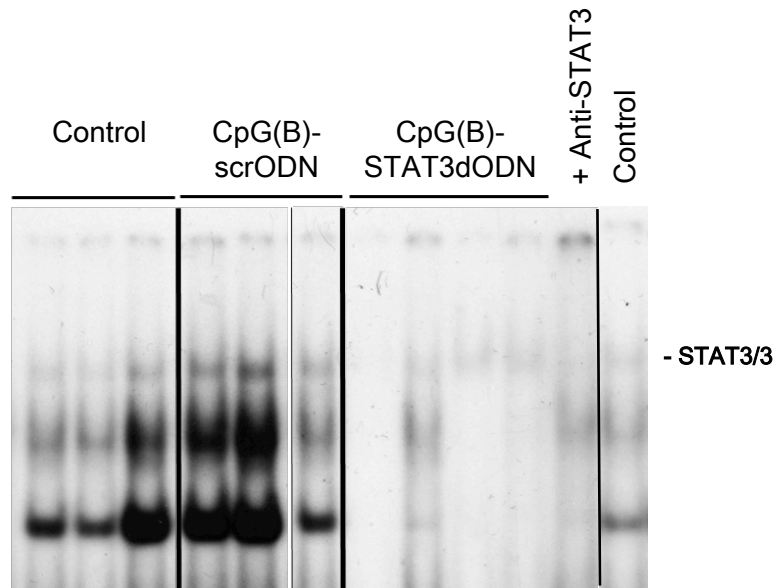

**Supplemental Fig. S4. Treatment with CpG(B)-STAT3dODN inhibits STAT3 DNA binding in human B cell lymphoma *in vivo*.**  $10^6$  of human B-cell lymphoma OCI-Ly3 cells were engrafted SC into NSG mice. After tumors were established, mice were treated using 1 mg/kg CpG(B)-STAT3dODN, control CpG(B)-scrODN or PBS every day for 3 days. Tumors were harvested for EMSA analysis of STAT3 activity using hSIE probe. The location of major STAT3-specific bands is indicated.

A

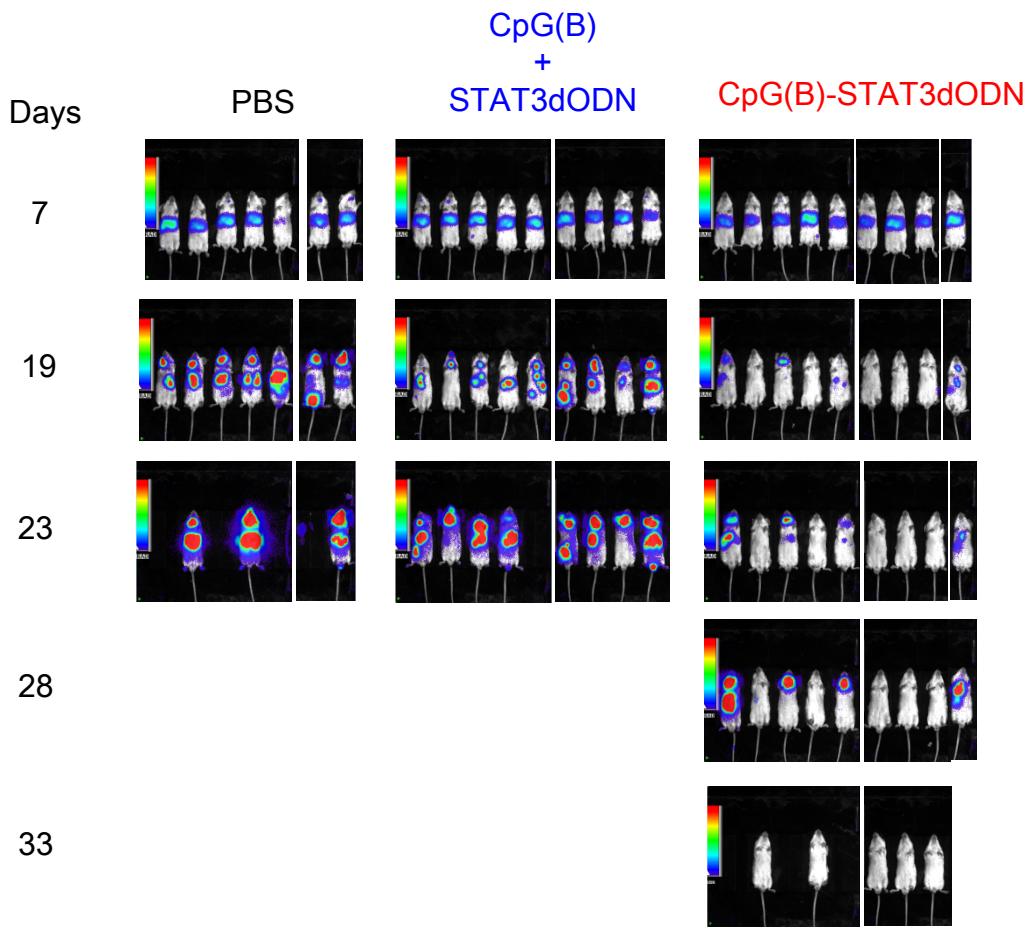

B

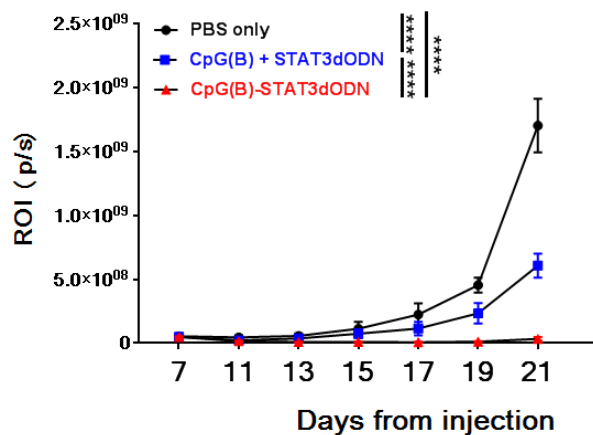

C

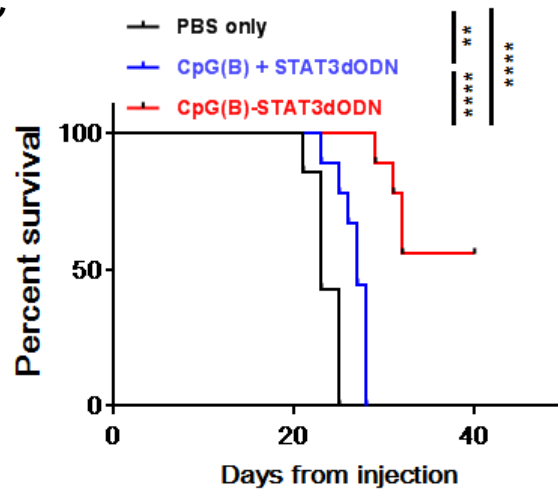

**Supplemental Fig. S5. CpG(B)-STAT3dODN showed better antitumor effect *in vivo* compared with co-injection of equimolar amounts of CpG and STAT3dODN.**

**(A)** Mice with established systemic A20<sup>LUC</sup> lymphoma were treated every other day starting from day 9 after injection using PBS or 5.3 nmole of each: CpG(B)-STAT3dODN, CpG(B) alone or together with equimolar amount of STAT3dODN alone; Lymphoma burden was monitored using BLI. **(B)** Tumor growth kinetics were assessed using quantification of the BLI signal during the experiment; ROI, regions of interest; p/s, photons/second; means  $\pm$  SEM ( $n = 9$ /per group, except for PBS:  $n = 7$ ). **(C)** CpG(B)-STAT3dODN but not CpG(B) plus STAT3dODN alone ( $n = 9$ /per group, except for PBS:  $n = 7$ ) results in long-term survival of the majority of mice.

A

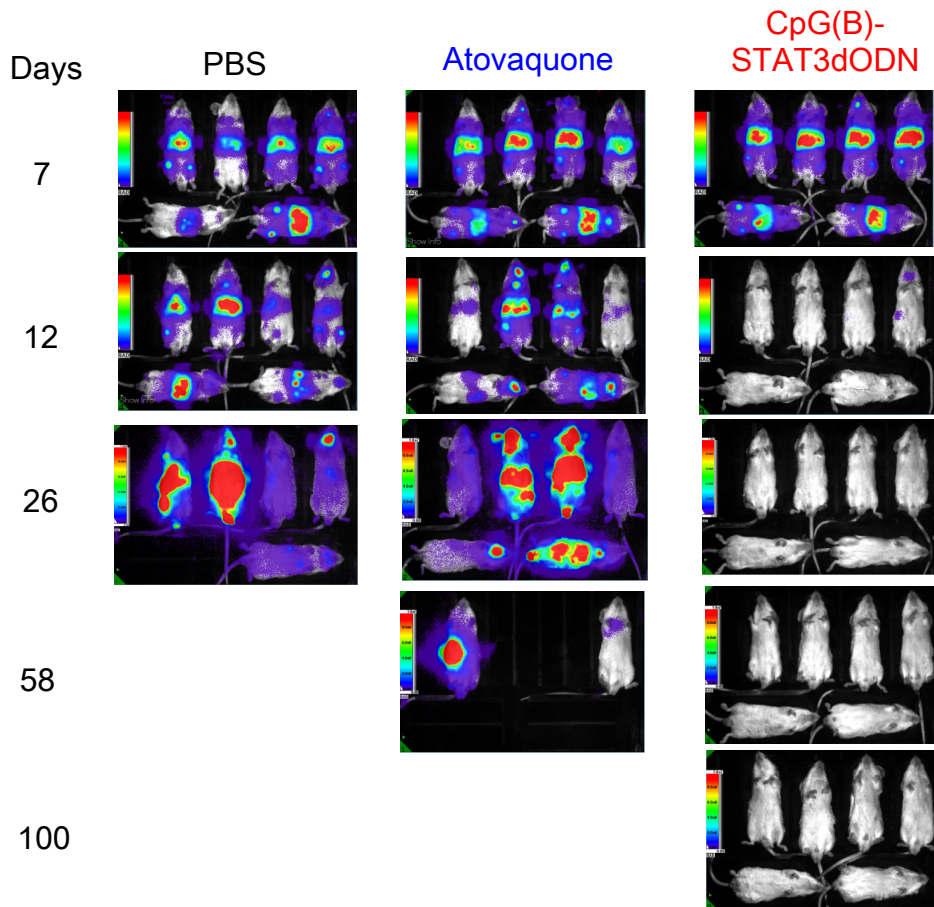

B

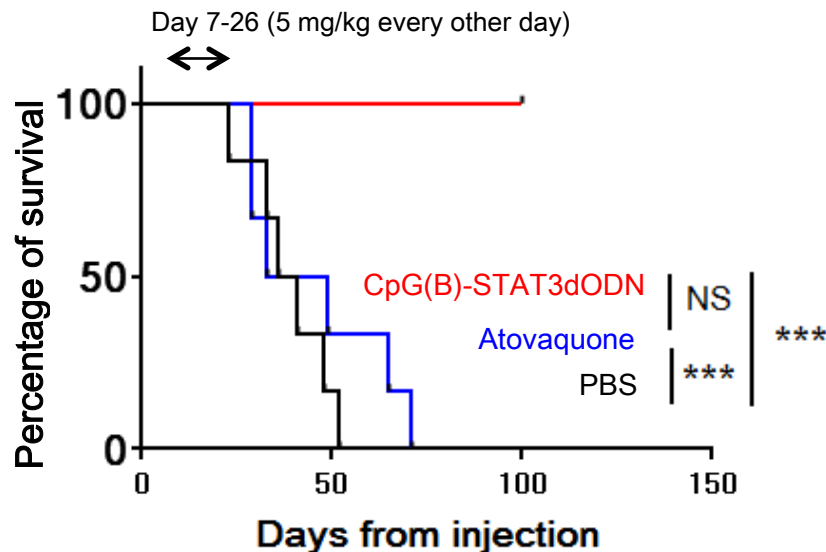

**Supplemental Fig. S6. Systemic administration of CpG(B)-STAT3dODN induces better regression of syngeneic A20 B-cell lymphoma mouse model compared with the STAT3 inhibitor (atovaquone) treatment. (A)** BALB/c mice with established disseminated A20<sup>LUC</sup> lymphoma were treated using 5 mg/kg/every other day of CpG(B)-STAT3dODN, 200 mg/kg/day atovaquone or PBS. Lymphoma burden was monitored using BLI for up to 100 days for surviving mice. Shown are representative images from one experiments. **(B)** Treatment with CpG(B)-STAT3dODN but not atovaquone ( $n = 6$ /per group) leads to long-term mice survival. Shown are survival curves for the indicated treatment groups.



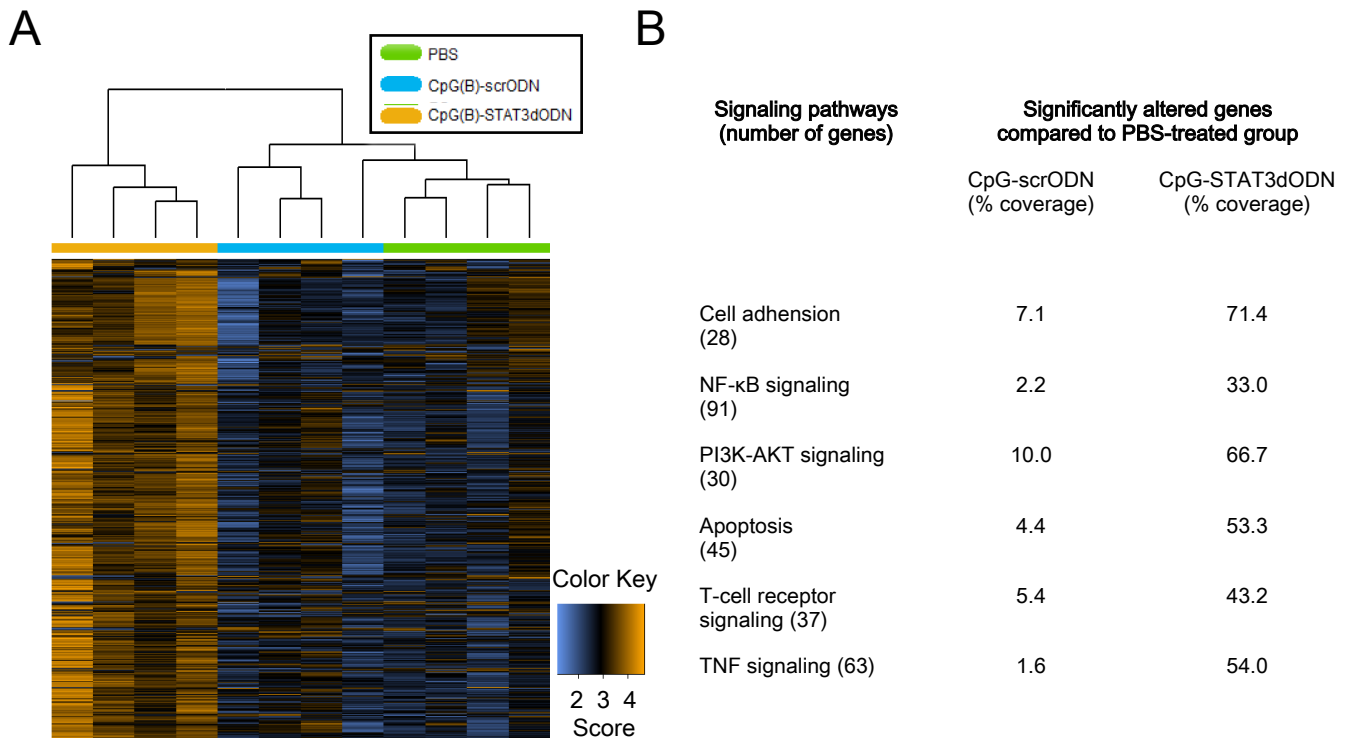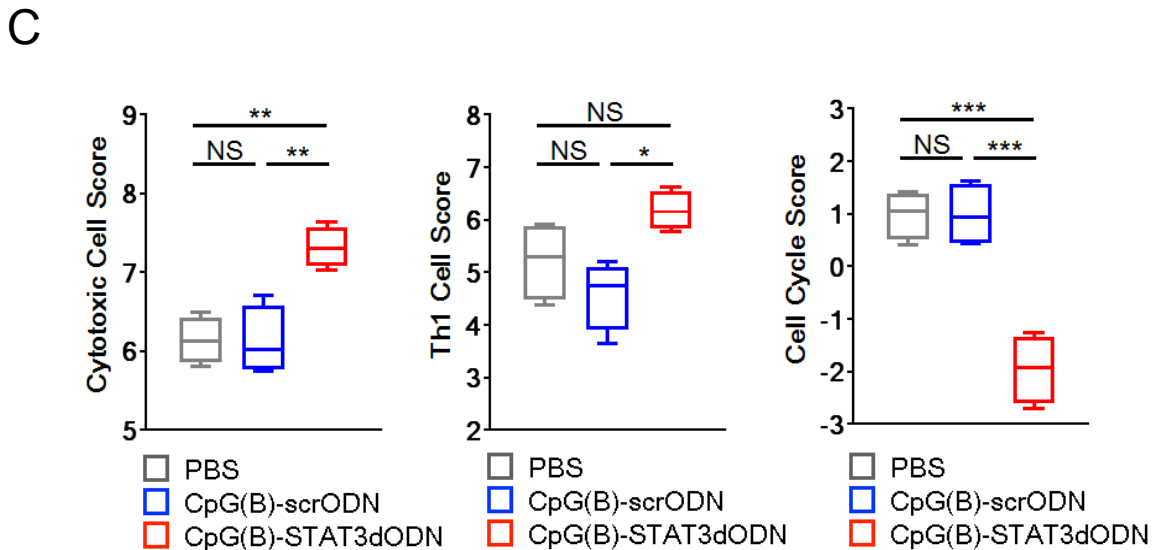

**Supplemental Fig. S7. Gene expression profiling of B-cell lymphoma following TLR9 stimulation with or without concurrent STAT3 inhibition.** Mice with established A20 lymphoma (SC) were treated starting on day 14 after tumor challenge using 1 mg/kg of CpG(B)-STAT3dODN, control CpG(B)-scrODN or PBS three times every other day ( $n = 4$ /per each group). Before tumor volumes differed, tumors were harvested to isolate total RNA for Nanostring gene expression analysis. **(A)** Comparative heat-map analysis of total gene expression changes in all samples. **(B)** Top functional pathways operating in CpG(B)-STAT3dODN- and control CpG(B)-scrODN-treated samples vs. PBS-treated controls. **(C)** Predictive scores generated by the nSolver analysis for the presence of cytotoxic cells (left), Th1 cells (middle) and the active cell cycle (right) in tested B-cell lymphoma samples; shown are means  $\pm$  SEM ( $n = 4$ ).

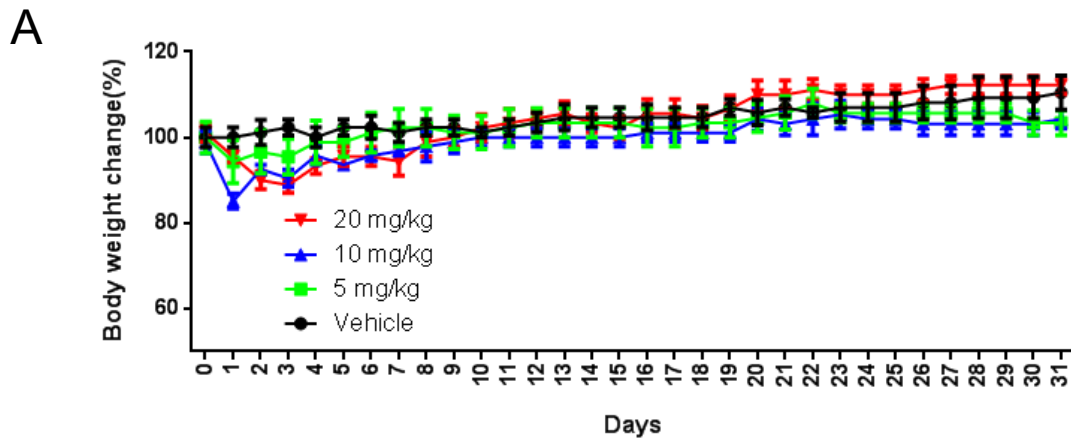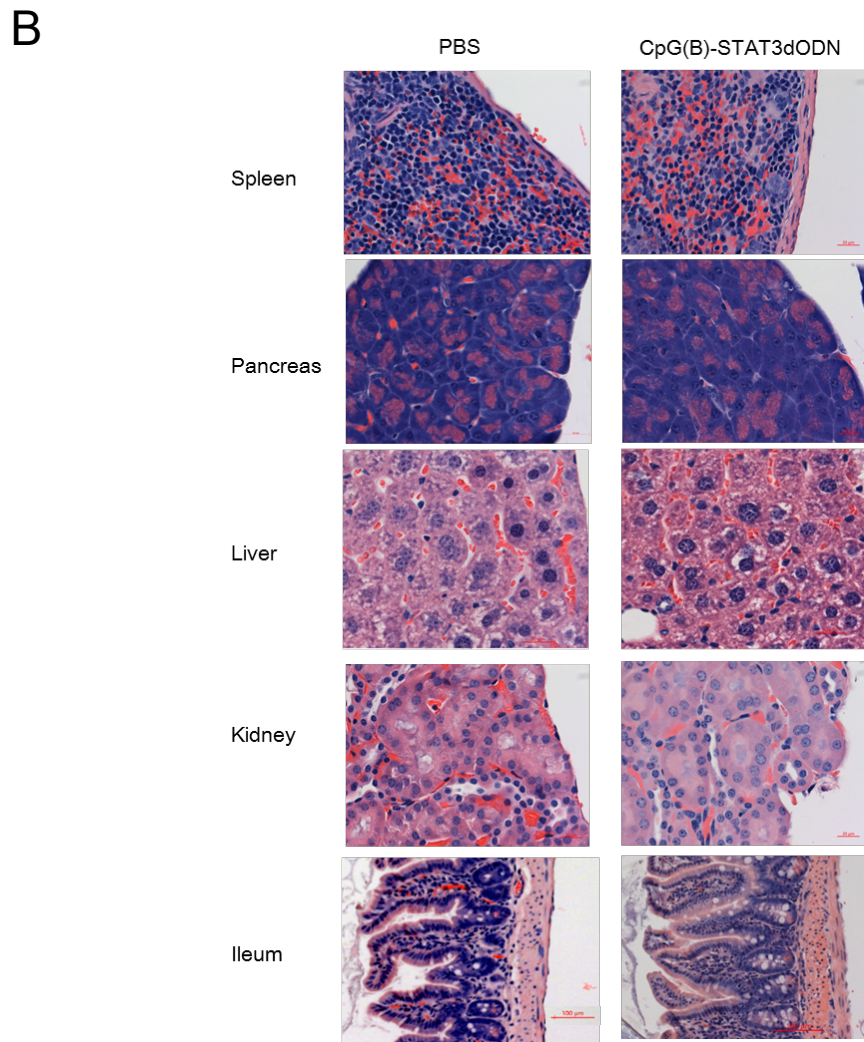

**Supplemental Fig. S8. Repeated injection of CpG(B)-STAT3dODN are well tolerated in mice. (A)** Balb/C mice were injected IV with 5, 10, or 20 mg/kg of CpG-STAT3dODN every other day for two weeks. The animal condition was monitored by changes in body weight compared to animal weight at the baseline (day 0) set as 100%. There were no toxicities or mortalities during the treatment and for up to 2 weeks after treatment completions. Shown are means  $\pm$  SD ( $n = 4$ ). **(B)** Repeated CpG(B)-STAT3dODN treatments did not result in gross abnormalities or inflammatory manifestations in tested organs as assessed 2 weeks after treatment completion. Histological assessment was performed on tissue sections from the highest dose group (60 mg/kg/week) vs. PBS control group. Tissue sections from the indicated organs were formalin fixed and stained using haematoxylin and eosin.

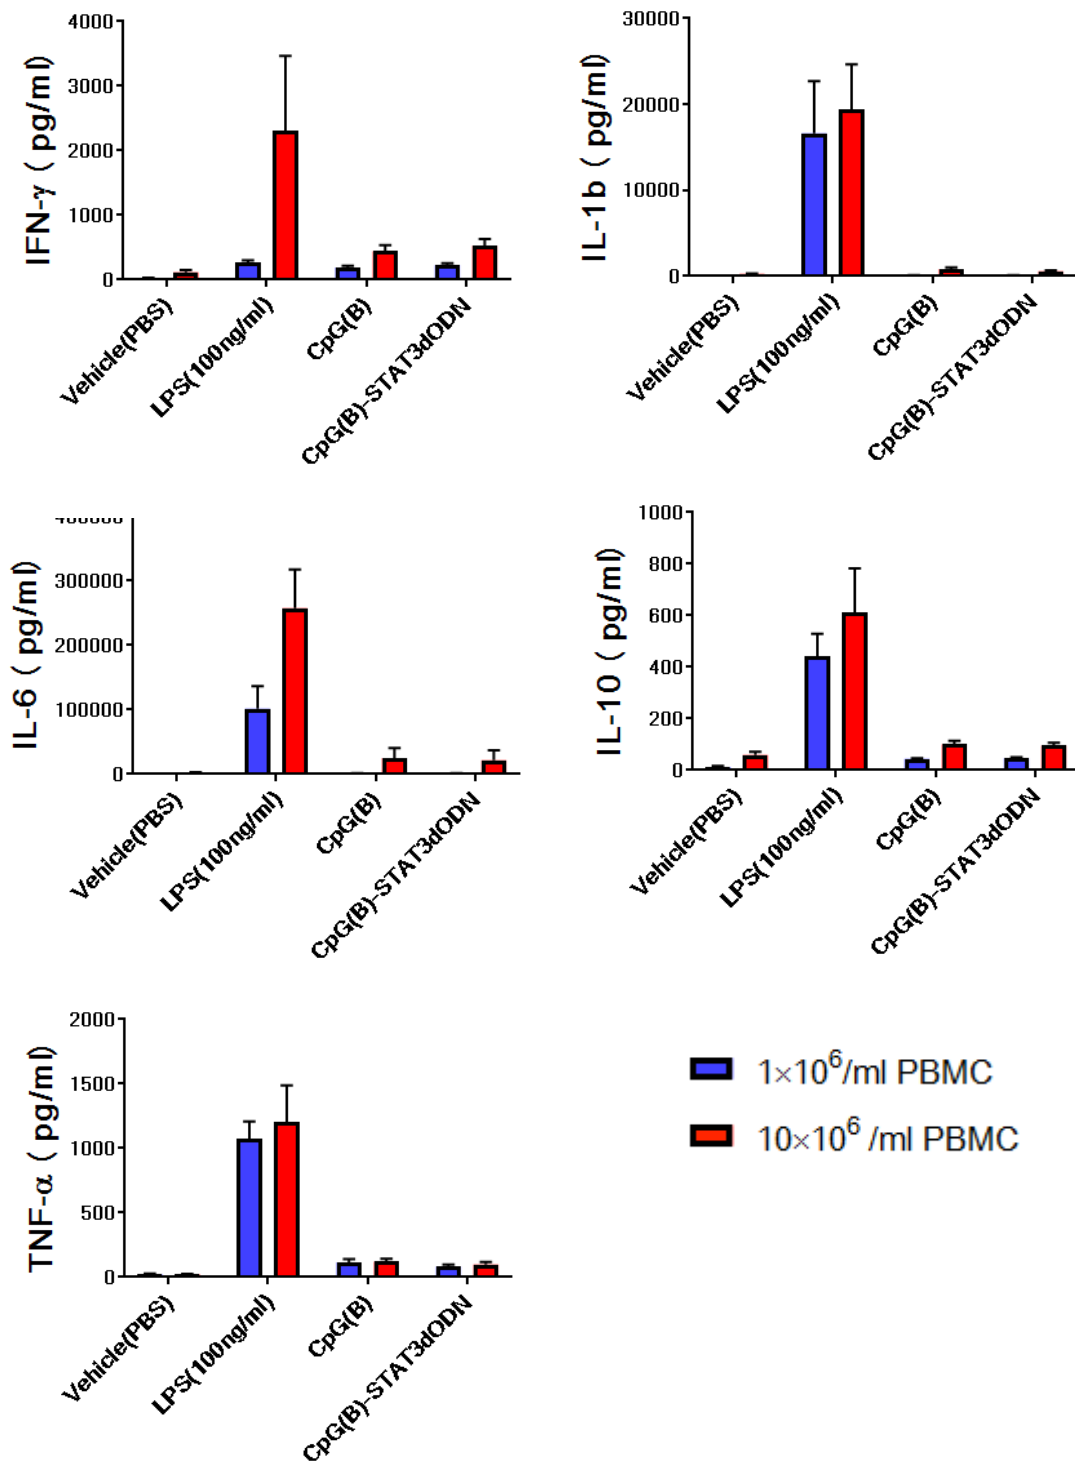

**Supplemental Fig. S9. Proinflammatory cytokine production by human PBMCs cultured at low or high cell density in the presence of CpG(B)-STAT3dODN.** Human PBMC isolated from from 9 healthy donors were cultured in RPMI 1640 medium (10% FBS) at standard or high density, 1 or 10 mln cells/ml, respectively. Cell were then treated using PBS, LPS (100 ng/ml), CpG(B) alone (1  $\mu$ M), CpG(B)-STAT3dODN (1  $\mu$ M) for 48 hours. Supernatant were collected and concentrations of immunoregulatory mediators was analyzed using Luminex assay; shown are means  $\pm$  SEM ( $n = 9$ ).
